# Supplementary material for: Risk of bias in industry-funded oseltamivir trials: comparison of core reports versus full clinical study reports
Source: HighWire-hosted journal article supplement (doi:10.1136/bmjopen-2014-005253), 2014-09-01
Supplement: bmjopen-2014-005253supp.pdf [file bmjopen-2014-005253supp.pdf]

Prepared August 22, 2014

**Instructions: Unfortunately, the manuscript system did not allow for Microsoft Excel files as supplementary files, only Microsoft Word. Therefore we have prepared this file to share our underlying dataset. To work with the data below, it may be easiest to select the table below and copy all values into a spreadsheet program e.g. Excel.**

| Trial ID | ROB element                                                          | 2012 assessment | 2012 rationale                                        |
|----------|----------------------------------------------------------------------|-----------------|-------------------------------------------------------|
| M76001   | Random sequence generation (selection bias)                          | Low             |                                                       |
| M76001   | Allocation concealment (selection bias)                              | Low             |                                                       |
| M76001   | Incomplete outcome data (attrition bias), symptoms                   | Low             |                                                       |
| M76001   | Incomplete outcome data (attrition bias), complications of influenza | Unclear         | Unclear how complications of influenza were defi      |
| M76001   | A159: Incomplete outcome data (attrition bias) safety                | Low             |                                                       |
| M76001   | Safety data                                                          | Low             |                                                       |
| M76001   | A159: Selective reporting (reporting bias)                           | Low             |                                                       |
| M76001   | A159: Other bias                                                     |                 |                                                       |
| M76001   | A159: Blinding of participants and personnel (performance bias)      |                 |                                                       |
| M76001   | All outcomes                                                         | Unclear         | Capsule size, but no details of colour or taste or ci |
| M76001   | A159: Blinding of outcome assessment (detection bias)                | Low             |                                                       |
| M76001   | All outcomes                                                         | Low             |                                                       |
| NV16871  | Random sequence generation (selection bias)                          | Low             |                                                       |
| NV16871  | Allocation concealment (selection bias)                              | Low             |                                                       |

Prepared August 22, 2014

|         |                                                                      |         |                                                                                                                                                                                    |
|---------|----------------------------------------------------------------------|---------|------------------------------------------------------------------------------------------------------------------------------------------------------------------------------------|
| NV16871 | Incomplete outcome data (attrition bias), symptoms                   | Low     |                                                                                                                                                                                    |
| NV16871 | Incomplete outcome data (attrition bias), complications of influenza | Low     |                                                                                                                                                                                    |
| NV16871 | A159: Incomplete outcome data (attrition bias)                       |         |                                                                                                                                                                                    |
| NV16871 | Safety data                                                          | Low     |                                                                                                                                                                                    |
| NV16871 | A159: Selective reporting (reporting bias)                           |         |                                                                                                                                                                                    |
| NV16871 | A159: Other bias                                                     |         |                                                                                                                                                                                    |
| NV16871 | A159: Blinding of participants and personnel (performance bias)      |         |                                                                                                                                                                                    |
| NV16871 | All outcomes                                                         | Unclear | Placebo colour/taste/contents not clear                                                                                                                                            |
| NV16871 | A159: Blinding of outcome assessment (detection bias)                |         |                                                                                                                                                                                    |
| NV16871 | All outcomes                                                         | Low     |                                                                                                                                                                                    |
| WP16263 | Random sequence generation (selection bias)                          | Unclear | Unclear risk Described as randomised; procedure                                                                                                                                    |
| WV15670 | Random sequence generation (selection bias)                          | Unclear | Described as randomised; procedure generating r<br>"The randomisation numbers were generated by ; inc., Princeton, NJ, USA)."<br>"The investigator telephoned the centre to report |
| WV15670 | Allocation concealment (selection bias)                              | Low     | The randomization number was then supplied by system (IVRS). The investigator entered the rand                                                                                     |
| WV15670 | Incomplete outcome data (attrition bias), symptoms                   | High    | Available data analyzed by ITTI population and no                                                                                                                                  |
| WV15670 | Incomplete outcome data (attrition bias),                            | High    | Possible effect of oseltamivir on antibody product complications in the infected subpopulation non-i                                                                               |

Prepared August 22, 2014

|             |                                                                                        |         |                                                                                                                                                                                                                                                               |
|-------------|----------------------------------------------------------------------------------------|---------|---------------------------------------------------------------------------------------------------------------------------------------------------------------------------------------------------------------------------------------------------------------|
| WV1567<br>0 | complications of influenza<br>Incomplete outcome data (attrition bias),<br>safety data | Low     | Based on all participants irrespective of complian                                                                                                                                                                                                            |
| WV1567<br>0 | Selective reporting (reporting bias), other bias                                       | High    | Outcomes of primary interest for the ITT populati                                                                                                                                                                                                             |
| WV1567<br>0 | Other bias                                                                             | Unclear | Placebo contained dehydrocholic acid. Dosage no<br>"In order to maintain blinding, each subject had 2 administered from each bottle twice per day at a<br>the first (day 1) visit                                                                             |
| WV1567<br>0 | Blinding of participants and personnel (performance bias), all outcomes                | Low     | Each bottle was labelled with the subject number placebo. Those subjects receiving 75 mg bid recei<br>matching capsule containing placebo from the oth<br>received one capsule containing 75 mg active dru<br>"No open key to the randomisation code was avai |
| WV1567<br>0 | Blinding of outcome assessment (detection bias), all outcomes                          | Low     | Roche Headquarters. In the event of a medical er<br>necessary to properly manage the subject, by con                                                                                                                                                          |
| WV1567      | Random sequence                                                                        | Unclear | The blinding was not required to be broken for an<br>Described as randomised; procedure generating                                                                                                                                                            |

Prepared August 22, 2014

|   |                                                                         |         |                                                                                                                                                                                                                                                                                                                                                                                                                                                                                                                                                                                    |
|---|-------------------------------------------------------------------------|---------|------------------------------------------------------------------------------------------------------------------------------------------------------------------------------------------------------------------------------------------------------------------------------------------------------------------------------------------------------------------------------------------------------------------------------------------------------------------------------------------------------------------------------------------------------------------------------------|
| 1 | generation (selection bias)                                             |         | randomisations schedule not available                                                                                                                                                                                                                                                                                                                                                                                                                                                                                                                                              |
| 1 | Allocation concealment (selection bias)                                 | Low     | “Randomisation was conducted by a central randomiser. The investigator /study coordinator telephoned the subjects initials, date of birth and smoking history. The randomisation number was entered in the appropriate place on the subject’s Case Report Form by the investigator.”                                                                                                                                                                                                                                                                                               |
| 1 | Incomplete outcome data (attrition bias), symptoms                      | Low     | Data from study participants without influenza were available for symptom relief                                                                                                                                                                                                                                                                                                                                                                                                                                                                                                   |
| 1 | Incomplete outcome data (attrition bias), complications of influenza    | High    | Possible effect of oseltamivir on antibody production makes the assessment of influenza status and associated complications in the infected subpopulation non-comparable between the treatment groups                                                                                                                                                                                                                                                                                                                                                                              |
| 1 | Incomplete outcome data (attrition bias), safety data                   | Low     | Based on all participants irrespective of compliance with treatment or infection status                                                                                                                                                                                                                                                                                                                                                                                                                                                                                            |
| 1 | Selective reporting (reporting bias), other bias                        | Low     | Outcomes of primary interest for the ITT population available in the CONSORT reconstruction                                                                                                                                                                                                                                                                                                                                                                                                                                                                                        |
| 1 | Other bias                                                              | High    | Placebo contained dehydrocholic acid<br>Matching placebo used<br>“In order to maintain the double blind nature of the study, subjects received 2 capsules twice daily for all treatments.”<br>“The identification number was added by the investigator at the time of randomisations”<br>“No open key to the code was available at the Study Center...”<br>“The identification number was added by the investigator at the time of randomisations.”<br>“No open key to the code was available at the Study Center, to the Monitors, Statisticians or at Gilead/Roche Headquarters” |
| 1 | Blinding of participants and personnel (performance bias), all outcomes | Low     |                                                                                                                                                                                                                                                                                                                                                                                                                                                                                                                                                                                    |
| 1 | Blinding of outcome assessment (detection bias), all outcomes           | Low     |                                                                                                                                                                                                                                                                                                                                                                                                                                                                                                                                                                                    |
| 3 | Random sequence generation (selection bias)                             | Unclear | Described as randomised; procedure generating random numbers                                                                                                                                                                                                                                                                                                                                                                                                                                                                                                                       |
| 3 | Allocation concealment (selection bias)                                 | Unclear | Inadequate information available to ascertain concealment                                                                                                                                                                                                                                                                                                                                                                                                                                                                                                                          |

Prepared August 22, 2014

|        |                         |         |                                                                                                                                 |
|--------|-------------------------|---------|---------------------------------------------------------------------------------------------------------------------------------|
| 7      |                         |         |                                                                                                                                 |
| WV1567 |                         |         |                                                                                                                                 |
| 3      | Incomplete outcome      |         |                                                                                                                                 |
| WV1569 | data (attrition bias),  |         |                                                                                                                                 |
| 7      | symptoms                | Low     | Not applicable to the study design (prophylaxis)                                                                                |
| WV1567 | Incomplete outcome      |         |                                                                                                                                 |
| 3      | data (attrition bias),  |         |                                                                                                                                 |
| WV1569 | complications of        |         |                                                                                                                                 |
| 7      | influenza               | High    | Possible effect of oseltamivir on antibody product complications in the infected subpopulation non-i                            |
| WV1567 | A159: Incomplete        |         |                                                                                                                                 |
| 3      | outcome data (attrition |         |                                                                                                                                 |
| WV1569 | bias)                   |         |                                                                                                                                 |
| 7      | Safety data             | Low     | Based on all randomised participants                                                                                            |
| WV1567 |                         |         |                                                                                                                                 |
| 3      | A159: Selective         |         |                                                                                                                                 |
| WV1569 | reporting (reporting    |         |                                                                                                                                 |
| 7      | bias)                   | Low     | Outcomes of primary interest for the ITT populati                                                                               |
| WV1567 |                         |         |                                                                                                                                 |
| 3      |                         |         |                                                                                                                                 |
| WV1569 |                         |         |                                                                                                                                 |
| 7      | A159: Other bias        | Unclear | Placebo contained dehydrocholic acid. Dosage no                                                                                 |
| WV1567 | A159: Blinding of       |         |                                                                                                                                 |
| 3      | participants and        |         |                                                                                                                                 |
| WV1569 | personnel (performance  |         |                                                                                                                                 |
| 7      | bias)                   | Unclear | Capsule size, but no details of colour or taste or c                                                                            |
| WV1567 | All outcomes            |         |                                                                                                                                 |
| 3      | A159: Blinding of       |         |                                                                                                                                 |
| WV1569 | outcome assessment      |         |                                                                                                                                 |
| 7      | (detection bias)        | Unclear | Inadequate information available to ascertain wh                                                                                |
| WV1570 | All outcomes            |         |                                                                                                                                 |
| 7      | Random sequence         | Unclear |                                                                                                                                 |
| WV1570 | generation (selection   |         |                                                                                                                                 |
| 7      | bias)                   | Unclear | Described as randomised; procedure generating r                                                                                 |
| WV1570 | Allocation concealment  |         |                                                                                                                                 |
| 7      | (selection bias)        | Low     | "Randomization was performed by a central rand<br>the subject's date of birth, vaccination status and<br>randomisation centre." |
| WV1570 | Incomplete outcome      |         |                                                                                                                                 |
| 7      | data (attrition bias),  |         |                                                                                                                                 |
| WV1570 | symptoms                | High    | Available data analyzed by ITTI population and no                                                                               |
| WV1570 | Incomplete outcome      |         |                                                                                                                                 |
| 7      | data (attrition bias),  |         |                                                                                                                                 |
| WV1570 | complications of        |         |                                                                                                                                 |
| 7      | influenza               | High    | Possible effect of oseltamivir on antibody product complications in the infected subpopulation non-i                            |

Prepared August 22, 2014

|             |                                                                                     |         |                                                                                                                              |
|-------------|-------------------------------------------------------------------------------------|---------|------------------------------------------------------------------------------------------------------------------------------|
| WV1570<br>7 | A159: Incomplete outcome data (attrition bias)<br>Safety data                       | Low     | Based on all randomised participants                                                                                         |
| WV1570<br>7 | A159: Selective reporting (reporting bias)                                          | High    | Outcomes of primary interest for the ITT population                                                                          |
| WV1570<br>7 | A159: Other bias<br>A159: Blinding of participants and personnel (performance bias) | Unclear | Placebo contained dehydrocholic acid. Dosage not stated                                                                      |
| WV1570<br>7 | All outcomes<br>A159: Blinding of outcome assessment (detection bias)               | Low     | Presentation of placebo described as identical                                                                               |
| WV1570<br>7 | All outcomes<br>Random sequence generation (selection bias)                         | Unclear | Inadequate information available to ascertain whether randomization was truly random                                         |
| WV1570<br>8 | Allocation concealment (selection bias)                                             | Unclear | Randomization numbers generated by Roche, but details not provided                                                           |
| WV1570<br>8 | Incomplete outcome data (attrition bias), symptoms                                  | Low     | Insufficient details given                                                                                                   |
| WV1570<br>8 | Incomplete outcome data (attrition bias), complications of influenza                | Low     | Outcomes available on all patients who complete study                                                                        |
| WV1570<br>8 | A159: Incomplete outcome data (attrition bias)<br>Safety data                       | Low     | Outcome data on all patients provided.                                                                                       |
| WV1570<br>8 | A159: Selective reporting (reporting bias)                                          | Low     | Outcome data reported.                                                                                                       |
| WV1570<br>8 | A159: Other bias<br>A159: Blinding of participants and personnel (performance bias) | Unclear | Placebo contents and colour and similarity to active treatment not stated. Could not analyze for primary outcome of efficacy |
| WV1570<br>8 | All outcomes                                                                        | Low     |                                                                                                                              |

Prepared August 22, 2014

|             |                                                                                          |              |                                                                                                                                                                                                                                                                              |
|-------------|------------------------------------------------------------------------------------------|--------------|------------------------------------------------------------------------------------------------------------------------------------------------------------------------------------------------------------------------------------------------------------------------------|
| WV1570<br>8 | A159: Blinding of outcome assessment (detection bias)<br>All outcomes<br>Random sequence | Low          | Outcome assessors were blind                                                                                                                                                                                                                                                 |
| WV1573<br>0 | generation (selection bias)                                                              | Unclear      | Described as randomised; procedure generating randomisations schedule not available<br>"Randomization was performed by a central randomisations service. The investigator telephoned the centre to report the subject's data number was then supplied by the randomisations  |
| WV1573<br>0 | Allocation concealment (selection bias)                                                  | Low          |                                                                                                                                                                                                                                                                              |
| WV1573<br>0 | Incomplete outcome data (attrition bias), symptoms                                       | High         | Available data analysed by ITTI population and not ITT<br>Possible effect of oseltamivir on antibody production makes the assessment of influenza status and associated complications in the infected subpopulation non-comparable between the treatment groups              |
| WV1573<br>0 | Incomplete outcome data (attrition bias), complications of influenza                     | High         |                                                                                                                                                                                                                                                                              |
| WV1573<br>0 | Incomplete outcome data (attrition bias), safety data                                    | Low          | Based on all randomised participants                                                                                                                                                                                                                                         |
| WV1573<br>0 | Selective reporting (reporting bias), other bias                                         | High<br>High | Outcomes of primary interest for the ITT population not made available to the review auth                                                                                                                                                                                    |
| WV1573<br>0 | Other bias                                                                               |              | Placebo capsule contained dehydrocholic acid                                                                                                                                                                                                                                 |
| WV1573<br>0 | Blinding of participants and personnel (performance bias), all outcomes                  | Low          | Matching placebo.<br>"No open key to the code was available at the study centre, to the monitors, statistician or at Roche Headquarters. In the event of a medical emergency the blinding was to be broken if considered absolutely mandatory to properly manage the patient |
| WV1573<br>0 | Blinding of outcome assessment (detection bias), all outcomes                            | Low          |                                                                                                                                                                                                                                                                              |
| WV1575<br>8 | Random sequence generation (selection bias)                                              | Unclear      | Described as randomised; procedure generating randomisations schedule not available                                                                                                                                                                                          |
| WV1575<br>8 | Allocation concealment (selection bias)                                                  | Low          | "Randomization was conducted by a central randomisations service, ICTI (Interactive                                                                                                                                                                                          |

Prepared August 22, 2014

|             |                                                                         |         |                                                                                                                                                                                                                                                                                                                                                                                                                                                |
|-------------|-------------------------------------------------------------------------|---------|------------------------------------------------------------------------------------------------------------------------------------------------------------------------------------------------------------------------------------------------------------------------------------------------------------------------------------------------------------------------------------------------------------------------------------------------|
|             |                                                                         |         | Clinical Technologies Inc., Princeton, NJ). The investigator telephoned the centre to report the subject's date of birth, sex, a centre in the form of a message on an interactive response system (IVRS). The investigator entered the randomisations number in the appropriate place on the case report form. The subject randomisations numbers were allocated sequentially within a stratum in the order in which subjects were enrolled." |
| WV1575<br>8 | Incomplete outcome data (attrition bias), symptoms                      | Low     | Data available for both influenza infected and non-infected study populations                                                                                                                                                                                                                                                                                                                                                                  |
| WV1575<br>8 | Incomplete outcome data (attrition bias), complications of influenza    | High    | Possible effect of oseltamivir on antibody production makes the assessment of influenza status and associated complications in the infected subpopulation non-comparable be                                                                                                                                                                                                                                                                    |
| WV1575<br>8 | Incomplete outcome data (attrition bias), safety data                   | Low     | Based on all randomized patients                                                                                                                                                                                                                                                                                                                                                                                                               |
| WV1575<br>8 | Selective reporting (reporting bias), other bias                        | Low     | Outcomes of primary interest to the review for ITT population available in the CONSORT-based extraction reconstruction                                                                                                                                                                                                                                                                                                                         |
| WV1575<br>8 | Other bias                                                              | Unclear | Unable to ascertain placebo capsule contents                                                                                                                                                                                                                                                                                                                                                                                                   |
| WV1575<br>8 | Blinding of participants and personnel (performance bias), all outcomes | Low     | "No open key to the code was available at the study centre..."                                                                                                                                                                                                                                                                                                                                                                                 |
| WV1575<br>8 | Blinding of outcome assessment (detection bias), all outcomes           | Low     | "No open key to the code was available (...) to the Roche monitors, statisticians or at Roche Headquarters."                                                                                                                                                                                                                                                                                                                                   |
| WV1575<br>9 | Random sequence generation (selection bias)                             | Unclear | Described as randomised; procedure generating randomisations schedule not available                                                                                                                                                                                                                                                                                                                                                            |
| WV1587<br>1 | Allocation concealment (selection bias)                                 | Low     | The subject randomizations numbers will be generated by Roche or its designee and incorp Randomization will be conducted by a central randomization service by telephone.                                                                                                                                                                                                                                                                      |
| WV1575<br>9 | Incomplete outcome data (attrition bias), symptoms                      | Unclear | Insufficient information was available to ascertain populations for analysis and judge risk of bias                                                                                                                                                                                                                                                                                                                                            |



Prepared August 22, 2014

|                                                                                                                                                                                                                                              |                                                                                                                                                                                                                                                                                                                                                                                                                                                                                                                                                                                                                                                                                                                                     |                                                                                                                                              |                                                                                                                                                                                                                                                                                                                                                                                                                                                                                                                                                                                                                                                                                                                                                                                                                                                                                                                                                                                                                                                                                         |
|----------------------------------------------------------------------------------------------------------------------------------------------------------------------------------------------------------------------------------------------|-------------------------------------------------------------------------------------------------------------------------------------------------------------------------------------------------------------------------------------------------------------------------------------------------------------------------------------------------------------------------------------------------------------------------------------------------------------------------------------------------------------------------------------------------------------------------------------------------------------------------------------------------------------------------------------------------------------------------------------|----------------------------------------------------------------------------------------------------------------------------------------------|-----------------------------------------------------------------------------------------------------------------------------------------------------------------------------------------------------------------------------------------------------------------------------------------------------------------------------------------------------------------------------------------------------------------------------------------------------------------------------------------------------------------------------------------------------------------------------------------------------------------------------------------------------------------------------------------------------------------------------------------------------------------------------------------------------------------------------------------------------------------------------------------------------------------------------------------------------------------------------------------------------------------------------------------------------------------------------------------|
| WV1575<br>9<br>WV1587<br>1<br>WV1575<br>9<br>WV1587<br>1<br>WV1575<br>9<br>WV1587<br>1<br>WV1575<br>9<br>WV1587<br>1<br>WV1575<br>9<br>WV1587<br>1<br>WV1575<br>9<br>WV1587<br>1<br>WV1579<br>9<br>WV1579<br>9<br>WV1579<br>9<br>WV1579<br>9 | <p>Incomplete outcome data (attrition bias), complications of influenza</p> <p>Incomplete outcome data (attrition bias), safety data</p> <p>Selective reporting (reporting bias), other bias</p> <p>Other bias</p> <p>Blinding of participants and personnel (performance bias), all outcomes</p> <p>Blinding of outcome assessment (detection bias), all outcomes</p> <p>Random sequence generation (selection bias)</p> <p>Allocation concealment (selection bias)</p> <p>Incomplete outcome data (attrition bias), symptoms</p> <p>Incomplete outcome data (attrition bias), complications of influenza</p> <p>Incomplete outcome data (attrition bias), safety data</p> <p>Selective reporting (reporting bias), other bias</p> | <p>Unclear</p> <p>Unclear</p> <p>High</p> <p>High</p> <p>Low</p> <p>Unclear</p> <p>Unclear</p> <p>Low</p> <p>High</p> <p>Low</p> <p>High</p> | <p>Insufficient information was available to ascertain populations for analysis and judge risk of bias</p> <p>Insufficient information was available to ascertain populations for analysis and judge risk of bias</p> <p>No outcome data were provided in the study CONSORT-based extraction reconstruction</p> <p>Placebo capsule contained dehydrocholic acid</p> <p>Matching placebo</p> <p>Inadequate information available to ascertain whether outcome assessors were aware of treatment group assignment</p> <p>Described as randomised; procedure generating randomisations schedule not available</p> <p>Inadequate information available to ascertain concealment of allocation</p> <p>Not applicable to the study design (prophylaxis) Possible effect of oseltamivir on antibody production makes the assessment of influenza status and associated complications in the infected subpopulation non-comparable between the treatment groups</p> <p>Based on all randomised participants</p> <p>Outcome data for ITT population were not available to the review authors</p> |
|----------------------------------------------------------------------------------------------------------------------------------------------------------------------------------------------------------------------------------------------|-------------------------------------------------------------------------------------------------------------------------------------------------------------------------------------------------------------------------------------------------------------------------------------------------------------------------------------------------------------------------------------------------------------------------------------------------------------------------------------------------------------------------------------------------------------------------------------------------------------------------------------------------------------------------------------------------------------------------------------|----------------------------------------------------------------------------------------------------------------------------------------------|-----------------------------------------------------------------------------------------------------------------------------------------------------------------------------------------------------------------------------------------------------------------------------------------------------------------------------------------------------------------------------------------------------------------------------------------------------------------------------------------------------------------------------------------------------------------------------------------------------------------------------------------------------------------------------------------------------------------------------------------------------------------------------------------------------------------------------------------------------------------------------------------------------------------------------------------------------------------------------------------------------------------------------------------------------------------------------------------|

Prepared August 22, 2014

|             |                                                                               |         |                                                                                                                                                        |
|-------------|-------------------------------------------------------------------------------|---------|--------------------------------------------------------------------------------------------------------------------------------------------------------|
| WV1579<br>9 | Other bias<br>Blinding of participants<br>and personnel                       | Unclear | No information available on placebo contents                                                                                                           |
| WV1579<br>9 | (performance bias), all<br>outcomes                                           | Unclear | Inadequate information available to ascertain<br>presentation of placebo capsules                                                                      |
| WV1579<br>9 | Blinding of outcome<br>assessment (detection<br>bias), all outcomes           | Unclear | Inadequate information available to ascertain<br>whether outcome assessors were aware<br>of treatment group assignment                                 |
| WV1581<br>2 | Random sequence<br>generation (selection<br>bias)                             | Unclear | Described as randomised; procedure generating r<br>"The randomisation numbers were generated by :<br>inc., Princeton, NJ, USA)."                       |
| WV1581<br>2 | Allocation concealment<br>(selection bias)                                    | Low     | "The investigator telephoned the centre to report<br>The randomization number was then supplied by<br>system (IVRS). The investigator entered the rand |
| WV1581<br>2 | Incomplete outcome<br>data (attrition bias),<br>symptoms                      | High    | Available data analyzed by ITTI population and no                                                                                                      |
| WV1581<br>2 | Incomplete outcome<br>data (attrition bias),<br>complications of<br>influenza | High    | Possible effect of oseltamivir on antibody product<br>complications in the infected subpopulation non-i                                                |
| WV1581<br>2 | Incomplete outcome<br>data (attrition bias),<br>safety data                   | Low     | Based on all participants irrespective of complian                                                                                                     |
| WV1581<br>2 | Selective reporting<br>(reporting bias), other<br>bias                        | High    | Outcomes of primary interest for the ITT populati                                                                                                      |
| WV1581<br>2 | Other bias<br>Blinding of participants<br>and personnel                       | Unclear | Placebo contained dehydrocholic acid. Dosage no                                                                                                        |
| WV1581<br>2 | (performance bias), all<br>outcomes                                           | Low     | Matching placebo described                                                                                                                             |
| WV1581      | Blinding of outcome                                                           | Unclear | Inadequate information available to ascertain wh                                                                                                       |

Prepared August 22, 2014

|                                                |                                                                      |         |                                                                                                                                                                                                                                                                                                                                                                                                                          |
|------------------------------------------------|----------------------------------------------------------------------|---------|--------------------------------------------------------------------------------------------------------------------------------------------------------------------------------------------------------------------------------------------------------------------------------------------------------------------------------------------------------------------------------------------------------------------------|
| 2<br>WV1587<br>2<br>WV1581<br>9<br>WV1587<br>6 | assessment (detection bias), all outcomes                            |         | of treatment group assignment                                                                                                                                                                                                                                                                                                                                                                                            |
| WV1597<br>8<br>WV1581<br>9<br>WV1587<br>6      | Random sequence generation (selection bias)                          | Unclear | Described as randomised; procedure generating randomisations schedule not available<br>"Randomization was conducted by a central randomisations service via telephone.<br>The investigator or study coordinator telephoned vaccination status and history of COAD, and the telephone number was then supplied by the centre. The randomisation was conducted in the appropriate place on the subject's Case Report Form. |
| WV1597<br>8<br>WV1581<br>9<br>WV1587<br>6      | Allocation concealment (selection bias)                              | Low     |                                                                                                                                                                                                                                                                                                                                                                                                                          |
| WV1597<br>8<br>WV1581<br>9<br>WV1587<br>6      | Incomplete outcome data (attrition bias), symptoms                   | Low     | Available data analysed for both by ITTI and ITT populations                                                                                                                                                                                                                                                                                                                                                             |
| WV1597<br>8<br>WV1581<br>9<br>WV1587<br>6      | Incomplete outcome data (attrition bias), complications of influenza | High    | Possible effect of oseltamivir on antibody production makes the assessment of influenza status and associated complications in the infected subpopulation non-comparable between the treatment groups                                                                                                                                                                                                                    |
| WV1597<br>8<br>WV1581<br>9<br>WV1587<br>6      | Incomplete outcome data (attrition bias), safety data                | Low     | Based on all randomised participants                                                                                                                                                                                                                                                                                                                                                                                     |
| WV1597<br>8<br>WV1581<br>9<br>WV1587<br>6      | Selective reporting (reporting bias), other bias                     | Low     | Outcomes of primary interest to the review are available in the CONSORT-based extraction reconstruction                                                                                                                                                                                                                                                                                                                  |
| WV1597<br>6                                    | Other bias                                                           | High    | Placebo capsule contained dehydrocholic acid                                                                                                                                                                                                                                                                                                                                                                             |

Prepared August 22, 2014

|        |                                                                      |         |                                                                                                                                                                                                                           |
|--------|----------------------------------------------------------------------|---------|---------------------------------------------------------------------------------------------------------------------------------------------------------------------------------------------------------------------------|
| 8      |                                                                      |         |                                                                                                                                                                                                                           |
| WV1581 |                                                                      |         |                                                                                                                                                                                                                           |
| 9      |                                                                      |         |                                                                                                                                                                                                                           |
| WV1587 | Blinding of participants and personnel                               |         |                                                                                                                                                                                                                           |
| 6      |                                                                      |         |                                                                                                                                                                                                                           |
| WV1597 | (performance bias), all outcomes                                     | Low     | Matching placebo described                                                                                                                                                                                                |
| 8      |                                                                      |         |                                                                                                                                                                                                                           |
| WV1581 |                                                                      |         |                                                                                                                                                                                                                           |
| 9      |                                                                      |         |                                                                                                                                                                                                                           |
| WV1587 |                                                                      |         |                                                                                                                                                                                                                           |
| 6      | Blinding of outcome assessment (detection bias), all outcomes        | Low     | “No open key to the code was available at the study centres, to the monitors, statisticians or at Roche headquarters. In the event of a medic mandatory to properly manage the subject, by co the randomisations centre.” |
| WV1597 | Random sequence generation (selection bias)                          |         |                                                                                                                                                                                                                           |
| 8      |                                                                      |         |                                                                                                                                                                                                                           |
| WV1582 |                                                                      | Unclear | Described as randomised; procedure generating r                                                                                                                                                                           |
| 5      |                                                                      |         |                                                                                                                                                                                                                           |
| WV1582 | Allocation concealment (selection bias)                              | Unclear | Inadequate information available to ascertain con                                                                                                                                                                         |
| 5      |                                                                      |         |                                                                                                                                                                                                                           |
| WV1582 | Incomplete outcome data (attrition bias), symptoms                   | Low     | Not applicable to the study design (prophylaxis)                                                                                                                                                                          |
| 5      |                                                                      |         |                                                                                                                                                                                                                           |
| WV1582 | Incomplete outcome data (attrition bias), complications of influenza | High    | Possible effect of oseltamivir on antibody product complications in the infected subpopulation non-i                                                                                                                      |
| 5      |                                                                      |         |                                                                                                                                                                                                                           |
| WV1582 | Incomplete outcome data (attrition bias), safety data                | Low     | Based on all randomised participants                                                                                                                                                                                      |
| 5      |                                                                      |         |                                                                                                                                                                                                                           |
| WV1582 | Selective reporting (reporting bias)                                 | High    | Outcome data relating to complications were not                                                                                                                                                                           |
| 5      |                                                                      |         |                                                                                                                                                                                                                           |
| WV1582 | Other bias                                                           | Unclear | Placebo contained dehydrocholic acid. Dosage no                                                                                                                                                                           |
| 5      |                                                                      |         |                                                                                                                                                                                                                           |
| WV1582 | Blinding of participants and personnel                               |         |                                                                                                                                                                                                                           |
| 5      |                                                                      |         |                                                                                                                                                                                                                           |
| WV1582 | (performance bias), all outcomes                                     | Unclear |                                                                                                                                                                                                                           |
| 5      |                                                                      |         |                                                                                                                                                                                                                           |
| WV1582 | Blinding of outcome assessment (detection bias), all outcomes        | Unclear |                                                                                                                                                                                                                           |
| 5      |                                                                      |         |                                                                                                                                                                                                                           |
