# Supplementary material for: Risk of bias in industry-funded oseltamivir trials: comparison of core reports versus full clinical study reports
Source: HighWire-hosted journal article supplement (doi:10.1136/bmjopen-2014-005253), 2014-09-01
Supplement: bmjopen-2014-005253supp_appendix.pdf [file bmjopen-2014-005253supp_appendix.pdf]

1 **Appendix 1. Table of content of an oseltamivir clinical study report, trial WV15799.**

16

**Tamiflu®** (oseltamivir phosphate)  
75mg Capsules, Hard  
12 mg/mL Oral Suspension

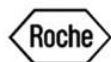

5.3.5.4.6 CSR WV15799 (W-144170)

## **CLINICAL STUDY REPORT MODULES**

**This report consists of 5 modules.**

**Those not supplied in this submission are obtainable from the sponsor on request.**

|                    |                                                                                                                                                                                                                                                                                                                              |
|--------------------|------------------------------------------------------------------------------------------------------------------------------------------------------------------------------------------------------------------------------------------------------------------------------------------------------------------------------|
| <b>MODULE I:</b>   | <b>CORE REPORT</b><br>Background and Rationale<br>Objectives<br>Materials and Methods<br>Efficacy Results<br>Safety Results<br>Discussion<br>Conclusion<br>Appendices                                                                                                                                                        |
| <b>MODULE II:</b>  | <b>STUDY DOCUMENTS</b><br>Protocol and Amendment History<br>Blank Case Report Form (CRF)<br>Subject Information Sheet and Consent Form<br>Glossaries of Original and Preferred Terms<br>Randomization List<br>Reporting Analysis Plan (RAP)<br>Certificates of Analysis<br>List of Investigators<br>List of Ethics Committee |
| <b>MODULE III:</b> | <b>LISTINGS OF DEMOGRAPHIC AND EFFICACY DATA</b>                                                                                                                                                                                                                                                                             |
| <b>MODULE IV:</b>  | <b>LISTINGS OF SAFETY DATA</b>                                                                                                                                                                                                                                                                                               |
| <b>MODULE V:</b>   | <b>STATISTICAL REPORT AND APPENDICES</b><br>Statistical Analysis<br>Efficacy Results                                                                                                                                                                                                                                         |

4 **Appendix 2. Mapping and extraction tool for oseltamivir clinical study report (CSR)**  
 5 **Module 2 elements to Cochrane Characteristics of Included Studies elements**

6 **Mapping Tamiflu CSR Module 2 elements to Cochrane Characteristics of**  
 7 **Included Studies elements**

8 Aim: To identify sections of the Clinical Study Reports (CSRs) Module 2 (defined as what  
 9 Roche calls “Module 2”) which may improve understanding of the content of the Cochrane  
 10 included studies table (CIST).

|                        |                       |
|------------------------|-----------------------|
| Drug:                  | Oseltamivir (Tamiflu) |
| CSR for trial(s):      |                       |
| Reviewer:              |                       |
| Date(s) of extraction: |                       |

11

12 **Notes:**

- 13 **1. Do not remove this notice**  
 14 **2. Do not merge cells in the tables (Merged cells wreak havoc in collating**  
 15 **answers in a spreadsheet)**  
 16 **3. Do not copy-paste images from the CSR**

17

18 **Trial Summary**

|                                     |                                                                                                                                     |
|-------------------------------------|-------------------------------------------------------------------------------------------------------------------------------------|
| Trial summary given in...           | Trial summary                                                                                                                       |
| CSR                                 | <i>(Short (2-3) sentence description of the trial as given in the CSR – most likely in the Synopsis section.)</i>                   |
| A159 (January 2012)                 | <i>(Copy and/or assemble this from the Characteristics of Included Studies table in the A159 review published in January 2012.)</i> |
| Your own words, after extracting M2 | <i>(Write a new trial summary that is accurate based on your understanding of the trial after reading M2.)</i>                      |

19

20 **Risk of bias**

| Bias                                        | A159 (Jan 2012) judgment | A159 (Jan 2012) support for judgment | Reviewer's judgment (post M2) | Support for judgment |
|---------------------------------------------|--------------------------|--------------------------------------|-------------------------------|----------------------|
| Random sequence generation (selection bias) |                          |                                      |                               |                      |
| Allocation                                  |                          |                                      |                               |                      |

|                                                                         |  |  |  |  |
|-------------------------------------------------------------------------|--|--|--|--|
| concealment (selection bias)                                            |  |  |  |  |
| Incomplete outcome data (attrition bias), symptoms                      |  |  |  |  |
| Incomplete outcome data (attrition bias), complications of influenza    |  |  |  |  |
| Incomplete outcome data (attrition bias), safety data                   |  |  |  |  |
| Selective reporting (reporting bias), other bias                        |  |  |  |  |
| Other bias                                                              |  |  |  |  |
| Blinding of participants and personnel (performance bias), all outcomes |  |  |  |  |
| Blinding of outcome assessment (detection bias), all outcomes           |  |  |  |  |

21

22 **Trial timeline**

| <b>Serial</b> | <b>Timeline element</b>                                                                                                              | <b>Date</b> | <b>Version (if a version name/number is given)</b> | <b>Page (PDF page no.) where item can be found</b> |
|---------------|--------------------------------------------------------------------------------------------------------------------------------------|-------------|----------------------------------------------------|----------------------------------------------------|
| A             | Patient enrollment dates                                                                                                             |             |                                                    |                                                    |
| B             | Unblinding of the trial                                                                                                              |             |                                                    |                                                    |
| C             | Protocol for which we have the full text (if we have multiple versions in full text, record all dates and versions)                  |             |                                                    |                                                    |
| D             | Protocol amendments (list all amendments with dates and their version stamp)                                                         |             |                                                    |                                                    |
| E             | Statistical Analysis Plan for which we have the full text (if we have multiple versions in full text, record all dates and versions) |             |                                                    |                                                    |

|   |                                                                         |  |  |  |
|---|-------------------------------------------------------------------------|--|--|--|
| F | SAP amendments (list all amendments with dates and their version stamp) |  |  |  |
| G | Patient consent form                                                    |  |  |  |
| H | Randomization list                                                      |  |  |  |
| I | Certificate of Analysis                                                 |  |  |  |

23

24

25

Reviewing sequence (write answers in each box)

26

| Serial | Cochrane Characteristics of Included Studies     | Check these M2 elements with care: | Is M1 reporting consistent with M2?<br>Yes – No – Unclear<br>(choose one) | If the answer is no then record the difference |
|--------|--------------------------------------------------|------------------------------------|---------------------------------------------------------------------------|------------------------------------------------|
| 1      | <b>METHODS</b>                                   |                                    |                                                                           |                                                |
| 1a     | ○ Study Design                                   | RPS                                |                                                                           |                                                |
| 1b     | ○ Location, number of centers                    | RPS LIESA                          |                                                                           |                                                |
| 1c     | ○ Duration of study                              | RPS                                |                                                                           |                                                |
| 2      | <b>PARTICIPANTS</b>                              |                                    |                                                                           |                                                |
| 2a     | ○ Number screened                                | -                                  | LEAVE BLANK UNLESS NEEDED                                                 | LEAVE BLANK UNLESS NEEDED                      |
| 2b     | ○ Number randomized                              | -                                  |                                                                           |                                                |
| 2c     | ○ Number completed                               | -                                  |                                                                           |                                                |
| 2d     | ○ Number analysed                                | -                                  |                                                                           |                                                |
| 2e     | ○ Male/Female ratio                              | -                                  |                                                                           |                                                |
| 2f     | ○ Mean age                                       | -                                  |                                                                           |                                                |
| 2g     | ○ Baseline details                               | -                                  |                                                                           |                                                |
| 2h     | ○ Inclusion criteria                             | RPS                                |                                                                           |                                                |
| 2i     | ○ Exclusion criteria                             | RPS                                |                                                                           |                                                |
| 2j     | ○ Definition of patient populations for analysis | RPS RAP                            |                                                                           |                                                |
| 3      | <b>INTERVENTIONS</b>                             |                                    |                                                                           |                                                |

|    |                                               |                                                                  |  |                                     |
|----|-----------------------------------------------|------------------------------------------------------------------|--|-------------------------------------|
| 3a | ○ Intervention                                | RPS CA RAP                                                       |  |                                     |
| 3b | ○ Control                                     | RPS CA RAP                                                       |  |                                     |
| 3c | ○ Treatment period                            | RPS RAP<br>FUC                                                   |  |                                     |
| 3d | ○ Treatment duration                          | RPS RAP<br>FUC                                                   |  |                                     |
| 3e | ○ Follow up (in days)                         | RPS RAP<br>FUC                                                   |  |                                     |
| 3f | ○ Co-interventions                            | RPS RAP                                                          |  |                                     |
| 4  | <b>OUTCOMES</b>                               |                                                                  |  |                                     |
| 4a | ○ Primary outcome                             | RPS RAP<br>CRF<br><br>Note: ensure CRF can capture relevant info |  |                                     |
| 4b | ○ Secondary outcomes                          | RPS RAP<br>CRF<br><br>Note: ensure CRF can capture relevant info |  |                                     |
| 5  | <b>NOTES</b>                                  |                                                                  |  | Make any other points you wish here |
| 6  | <b>RISK OF BIAS</b>                           |                                                                  |  |                                     |
| 6a | ○ Random sequence generation (selection bias) | RPS RL                                                           |  |                                     |
| 6b | ○ Allocation concealment (selection bias)     | RPS                                                              |  |                                     |
| 6c | ○ Incomplete outcome data (attrition bias)    | RPS IC<br><br>Note: IC may contain                               |  |                                     |

|    |                                                             |                                                                                                                |                                                                             |  |
|----|-------------------------------------------------------------|----------------------------------------------------------------------------------------------------------------|-----------------------------------------------------------------------------|--|
|    |                                                             | details that suggest possible influence on retention or attrition                                              |                                                                             |  |
| 6d | ○ Selective reporting (reporting bias)                      | RPS IC<br>LIESA<br><br>Note: check if all contributors listed in core report are present in protocol and LIESA |                                                                             |  |
| 6e | ○ Other bias                                                | RPS                                                                                                            |                                                                             |  |
| 6f | ○ Blinding of participants and personnel (performance bias) | RPS CA<br><br>Note: ensure CA supports description of placebo and active elsewhere in CSR                      | Are the intervention and control identical in all but the active principle? |  |
| 6g | ○ Blinding of outcome assessment (detection bias)           | RPS CA<br><br>Note: ensure CA supports description of placebo and active elsewhere in CSR                      |                                                                             |  |

27

28 **CA** = Certificate of Analysis

29 **CRF** = Case Report Form(s)

30 **FUC** = Follow up cards/Diary cards

31 **IC** = Informed Consent and participant contract

32 **LIESA** = Lists of Investigators, IRB, EC and Site Addresses

33 **RAP** = Reporting Analysis Plan (Roche's term for the Statistical Analysis Plan (SAP))

34 **RL** = Randomisation List

35 **RPS** = Relevant Protocol Section (including latest amendments)

36

37 NOTE: Roche protocol amendments are designated with a suffix letter e.g. B, C, D. The latest  
38 version of the protocol is the one that should be followed in the trial which then assumes the suffix  
39 to denote the version followed e.g. WV 15799H.

40

41
